# Supplementary material for: A Fragrant Environment Containing α-Pinene Suppresses Tumor Growth in Mice by Modulating the Hypothalamus/Sympathetic Nerve/Leptin Axis and Immune System
Source: PubMed Central journal article supplement — Integr Cancer Ther. 2019 Apr 25;18:1534735419845139. doi: 10.1177/1534735419845139 (PMC6484235; doi:10.1177/1534735419845139), 2019-04-25
Supplement: Supplemental_Material_fragrant_envieonment_tumor_growth_Kusuhara__ICT-2018-210.R1.pdf [file Supplemental_Material_fragrant_envieonment_tumor_growth_Kusuhara__ICT-2018-210.R1.pdf]

|                            | Control  |         | Pinene   |         | p-value |
|----------------------------|----------|---------|----------|---------|---------|
|                            | Mean     | SD      | Mean     | SD      |         |
| Glucose 1-phosphate        | 40.19    | 5.31    | 28.37    | 5.11    | p<0.05  |
| Glucose 6-phosphate        | 74.23    | 16.76   | 77.12    | 12.13   | NS      |
| Fructose 6-phosphate       | 11.95    | 2.34    | 13.40    | 2.30    | NS      |
| Fructose 1,6-diphosphate   | 166.67   | 50.13   | 188.55   | 15.65   | NS      |
| Dihydroxyacetone phosphate | 5.13     | 0.46    | 4.48     | 1.81    | NS      |
| 3-Phosphoglyceric acid     | 26.02    | 4.46    | 29.07    | 9.29    | NS      |
| Phosphoenolpyruvic acid    | 13.35    | 1.98    | 14.64    | 2.85    | NS      |
| Pyruvic acid               | 454.86   | 58.85   | 492.66   | 164.68  | NS      |
| Lactic acid                | 22944.91 | 3268.33 | 21769.76 | 2896.40 | NS      |
| Citric acid                | 799.34   | 82.67   | 837.95   | 103.90  | NS      |
| cis-Aconitic acid          | 10.74    | 0.68    | 11.56    | 2.19    | NS      |
| Isocitric acid             | 12.02    | 0.48    | 11.33    | 5.45    | NS      |
| Succinic acid              | 1377.94  | 183.77  | 1299.81  | 300.45  | NS      |
| Fumaric acid               | 207.24   | 18.38   | 216.07   | 25.79   | NS      |
| Malic acid                 | 1031.55  | 125.82  | 1028.19  | 118.67  | NS      |
| Gluconic acid              | 14.75    | 1.84    | 15.72    | 2.31    | NS      |
| 6-Phosphogluconic acid     | 21.02    | 3.78    | 16.59    | 6.54    | NS      |
| Ribulose 5-phosphate       | 180.13   | 38.99   | 173.62   | 32.64   | NS      |
| Ribose 5-phosphate         | 4.93     | 0.77    | 6.80     | 5.40    | NS      |
| Sedoheptulose 7-phosphate  | 19.41    | 2.91    | 18.80    | 3.45    | NS      |
| PRPP                       | 8.57     | 1.91    | 9.72     | 1.18    | NS      |
| Hypoxanthine               | 65.66    | 19.11   | 59.18    | 17.96   | NS      |
| Inosine                    | 126.91   | 30.84   | 151.34   | 96.41   | NS      |
| IMP                        | 590.60   | 54.31   | 591.71   | 82.71   | NS      |
| Adenine                    | 3.71     | 1.18    | 3.20     | 1.28    | NS      |
| Adenosine                  | 288.91   | 71.70   | 231.95   | 135.31  | NS      |
| AMP                        | 2584.23  | 275.86  | 2576.42  | 323.87  | NS      |
| ADP                        | 739.04   | 200.17  | 708.35   | 94.36   | NS      |
| ATP                        | 664.99   | 201.51  | 737.08   | 288.95  | NS      |
| cAMP                       | 15.94    | 2.64    | 17.57    | 7.91    | NS      |
| dATP                       | 0.21     | 0.04    | 0.22     | 0.02    | NS      |
| Guanine                    | 2.27     | 0.59    | 1.91     | 0.57    | NS      |
| Guanosine                  | 21.43    | 6.30    | 19.10    | 5.49    | NS      |
| GMP                        | 396.72   | 51.38   | 396.19   | 66.10   | NS      |
| GDP                        | 338.83   | 38.69   | 329.30   | 49.90   | NS      |
| GTP                        | 264.78   | 35.45   | 243.22   | 93.62   | NS      |
| cGMP                       | 8.78     | 3.57    | 6.60     | 5.81    | NS      |
| Cytosine                   | 1.16     | 0.22    | 0.99     | 0.23    | NS      |
| Cytidine                   | 18.03    | 3.19    | 17.17    | 4.26    | NS      |
| CMP                        | 40.88    | 7.44    | 45.46    | 5.61    | NS      |
| CDP                        | 7.12     | 1.44    | 9.00     | 2.57    | NS      |
| CTP                        | 5.50     | 1.54    | 7.03     | 3.96    | NS      |
| Uracil                     | 17.81    | 3.26    | 16.49    | 2.70    | NS      |
| Uridine                    | 65.78    | 12.98   | 60.43    | 8.11    | NS      |
| UTP                        | 28.56    | 9.33    | 34.89    | 25.95   | NS      |
| dTMP                       | 0.33     | 0.05    | 0.35     | 0.05    | NS      |
| dTDP                       | 1.05     | 0.19    | 0.95     | 0.28    | NS      |
| NAD+                       | 787.83   | 103.71  | 749.38   | 127.08  | NS      |
| NADH                       | 8648.81  | 1093.16 | 7785.53  | 2382.57 | NS      |
| NADP+                      | 21.76    | 1.52    | 21.18    | 5.06    | NS      |
| NADPH                      | 2766.69  | 350.98  | 2455.19  | 1404.68 | NS      |
| FAD                        | 813.59   | 136.39  | 722.84   | 160.49  | NS      |
| CoA                        | 1232.27  | 617.99  | 722.89   | 847.80  | NS      |
| Glycerol-3-phosphate       | 1254.81  | 196.61  | 1167.62  | 317.58  | NS      |
| Anthranilic acid           | 2.64     | 0.52    | 2.79     | 0.92    | NS      |

|                             |         |        |         |           |
|-----------------------------|---------|--------|---------|-----------|
| Glutathione (GSSG) divalent | 328.37  | 52.41  | 416.04  | 103.83 NS |
| Glutathione (GSH)           | 967.99  | 148.30 | 727.44  | 370.48 NS |
| Ornithine                   | 5.47    | 1.23   | 4.97    | 1.65 NS   |
| Citrulline                  | 6.11    | 1.25   | 6.65    | 1.96 NS   |
| Putrescine                  | 1.41    | 0.44   | 1.41    | 0.56 NS   |
| Spermidine                  | 5.03    | 0.77   | 6.02    | 1.55 NS   |
| Spermine                    | 2.49    | 1.44   | 4.16    | 2.33 NS   |
| Creatine                    | 5313.13 | 600.26 | 5561.02 | 826.26 NS |
| Creatinine                  | 15.98   | 1.88   | 14.90   | 2.39 NS   |
| γ-Aminobutyric acid         | 3277.77 | 535.00 | 3460.65 | 390.96 NS |
| Carnosine                   | 103.64  | 19.16  | 93.92   | 12.16 NS  |
| β-Ala                       | 96.09   | 16.45  | 108.67  | 24.49 NS  |
| Tyramine                    | 0.33    | 0.12   | 0.39    | 0.05 NS   |
| Hydroxyproline              | 11.98   | 1.82   | 14.34   | 1.96 NS   |
| Homoserine                  | 5.68    | 1.23   | 5.94    | 0.78 NS   |
| S-Adenosylmethionine        | 16.46   | 3.11   | 15.30   | 4.95 NS   |
| Gly                         | 1190.90 | 168.13 | 1128.87 | 103.02 NS |
| Ala                         | 544.04  | 102.45 | 575.04  | 78.98 NS  |
| Val                         | 87.16   | 12.65  | 89.91   | 17.69 NS  |
| Ile                         | 34.19   | 4.34   | 33.33   | 7.23 NS   |
| Leu                         | 66.42   | 10.07  | 66.93   | 11.20 NS  |
| Phe                         | 75.86   | 13.03  | 79.44   | 15.66 NS  |
| Tyr                         | 79.29   | 17.51  | 80.86   | 16.81 NS  |
| Trp                         | 13.35   | 1.84   | 13.56   | 3.77 NS   |
| Met                         | 49.21   | 9.51   | 52.95   | 7.35 NS   |
| Cys                         | 4.75    | 1.77   | 2.64    | 1.37 NS   |
| Pro                         | 69.97   | 13.50  | 73.25   | 9.33 NS   |
| Lys                         | 182.20  | 22.61  | 193.63  | 29.33 NS  |
| Arg                         | 88.83   | 26.03  | 87.03   | 29.66 NS  |
| His                         | 85.14   | 14.20  | 85.45   | 13.65 NS  |
| Asp                         | 1774.79 | 228.05 | 1780.84 | 209.54 NS |
| Glu                         | 4186.56 | 573.10 | 4388.49 | 570.60 NS |
| Ser                         | 572.92  | 85.49  | 616.33  | 84.12 NS  |
| Thr                         | 318.78  | 40.41  | 345.61  | 6.59 NS   |
| Asn                         | 79.40   | 11.55  | 75.40   | 15.78 NS  |
| Gln                         | 3342.51 | 423.30 | 3419.06 | 425.38 NS |
